# Supplementary material for: Blocking XIAP:CASP7-p19 selectively induces apoptosis of CASP3/DR malignancies by a novel reversible small molecule
Source: Springer Nature journal article supplement (doi:10.1038/s41419-025-07774-y), 2025-06-18
Supplement: MOESM1 [file 41419_2025_7774_MOESM1_ESM.pdf]

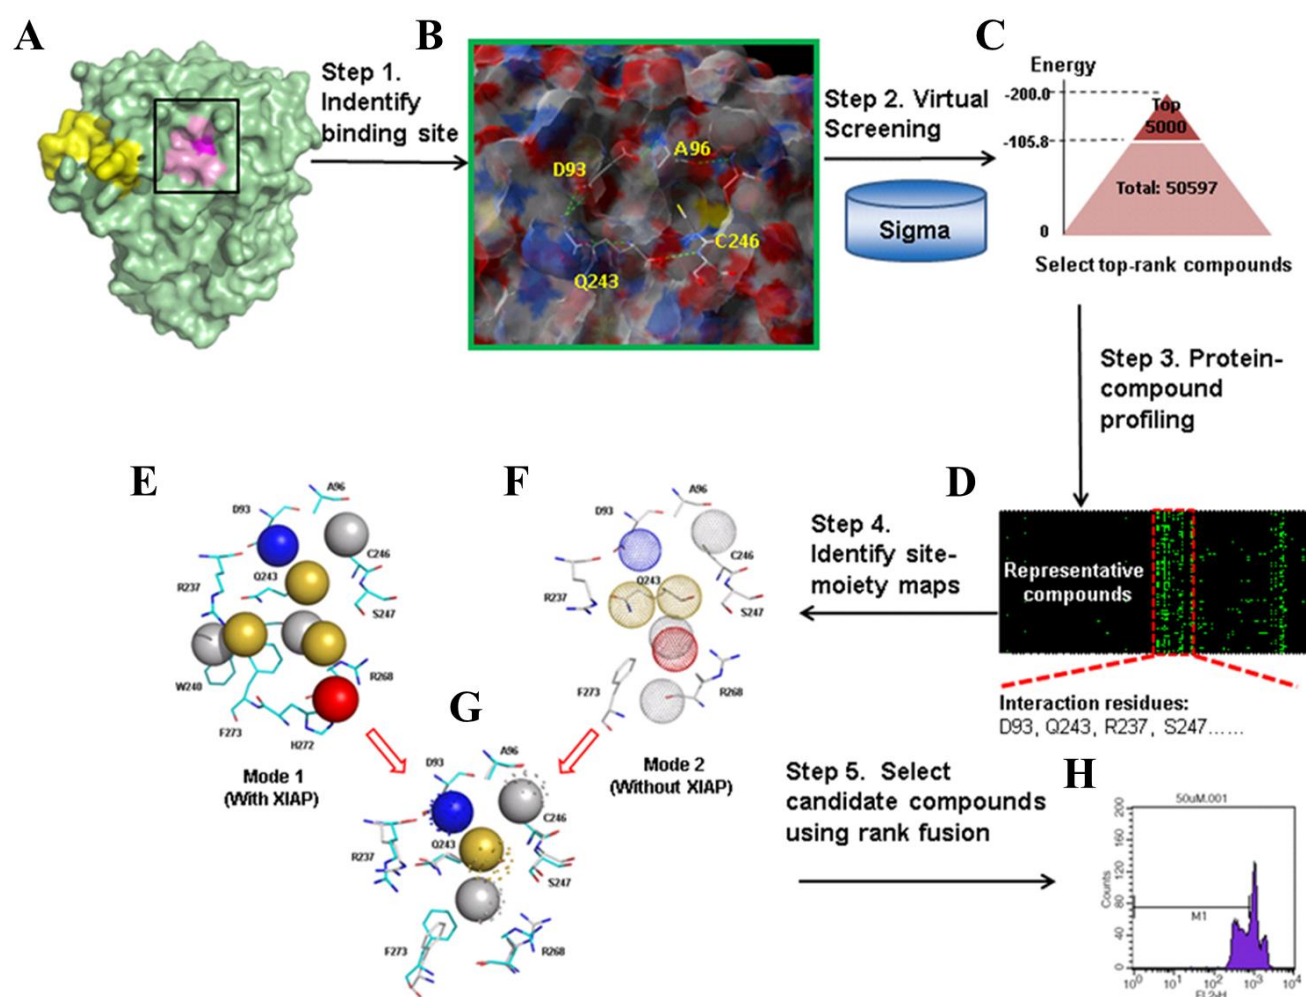

**Supplementary Figure 1. Virtual Screening Strategy and Site-moiety Maps for Identifying the PPI Inhibitor.** (A) The hot spot around Cys246 of CASP7 and (B) the site with four amino acids shown was used for virtual screening to identify the PPI inhibitor. (C) Compound library (Sigma-Aldrich) was screened using GEMDOCK and top-ranking 5000 compounds were selected for generating (D) residue-compound interaction profiles. Site-moiety map for CASP7 with XIAP (E) and that for free CASP7 (F) were derived based on conserved interactions between binding pockets and chemical moieties. (G) A common site-moiety-map was identified. (H) Compound candidates based on rank-based consensus scores combining energy-based and anchor-based ranks were selected for bioassay.

| Anchor                                                                  | Pocket |     | Moiety (functional group)                                                                                   |                                                                                                                 |                                                                                          |                                                                                                                  |                                                                                            |               |
|-------------------------------------------------------------------------|--------|-----|-------------------------------------------------------------------------------------------------------------|-----------------------------------------------------------------------------------------------------------------|------------------------------------------------------------------------------------------|------------------------------------------------------------------------------------------------------------------|--------------------------------------------------------------------------------------------|---------------|
| <input checked="" type="checkbox"/> H1<br><a href="#">553 compounds</a> | K      | 92  | 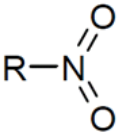<br>20%                    | <br>12%                        | <br>7%  | <br>7%                        | <br>6%  | others<br>47% |
|                                                                         | D      | 93  |                                                                                                             |                                                                                                                 |                                                                                          |                                                                                                                  |                                                                                            |               |
|                                                                         | R      | 237 |                                                                                                             |                                                                                                                 |                                                                                          |                                                                                                                  |                                                                                            |               |
| <input checked="" type="checkbox"/> H2<br><a href="#">595 compounds</a> | Q      | 243 | <br>31%                    | <br>15%                        | <br>10% | <br>10%                       | R-OH<br>5%                                                                                 | others<br>29% |
|                                                                         | S      | 247 |                                                                                                             |                                                                                                                 |                                                                                          |                                                                                                                  |                                                                                            |               |
| <input checked="" type="checkbox"/> V1<br><a href="#">508 compounds</a> | A      | 96  | <br>Aromatic moiety<br>41% | <br>11%                        | <br>6%  | <br>Heterocyclic moiety<br>5% | <br>4%  | others<br>33% |
|                                                                         | C      | 246 |                                                                                                             |                                                                                                                 |                                                                                          |                                                                                                                  |                                                                                            |               |
|                                                                         | E      | 250 |                                                                                                             |                                                                                                                 |                                                                                          |                                                                                                                  |                                                                                            |               |
| <input checked="" type="checkbox"/> V2<br><a href="#">864 compounds</a> | Q      | 243 | <br>Aromatic moiety<br>35% | <br>Heterocyclic moiety<br>11% | <br>8%  | <br>8%                       | <br>4% | others<br>33% |
|                                                                         | R      | 268 |                                                                                                             |                                                                                                                 |                                                                                          |                                                                                                                  |                                                                                            |               |
|                                                                         | F      | 273 |                                                                                                             |                                                                                                                 |                                                                                          |                                                                                                                  |                                                                                            |               |

**Supplementary Figure 2. The chemical moieties of common site-moiety-maps.** The moiety compositions of four consensus anchors on the binding modes 1 (with linker-BIR2 of XIAP) and 2 (without XIAP) located at the **643943** binding site of CASP7. These results were produced by SiMMap.

**A**

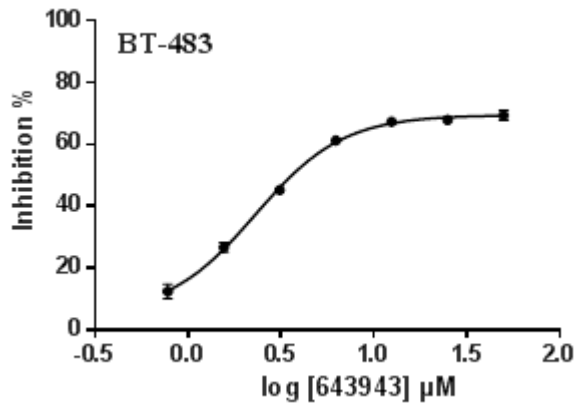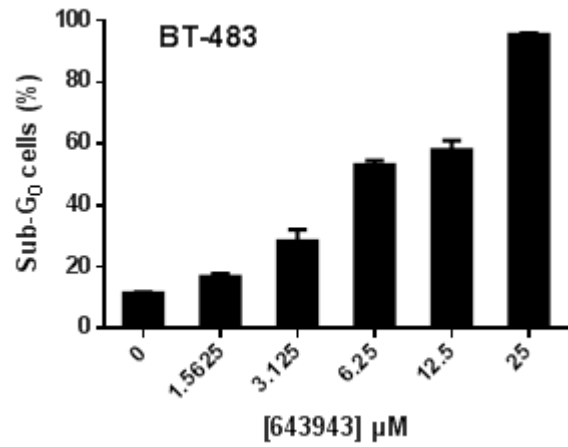

**B**

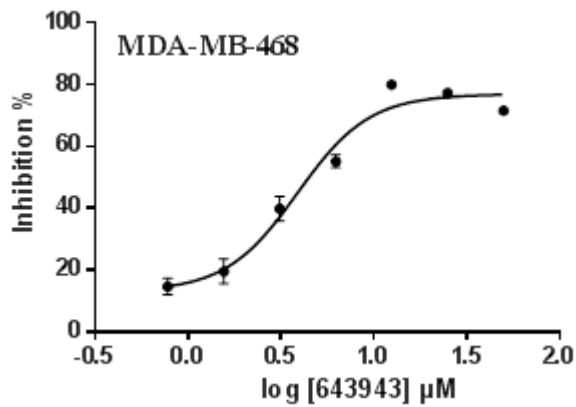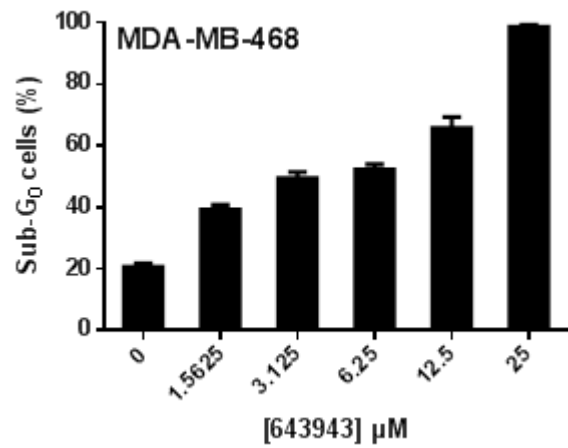

**C**

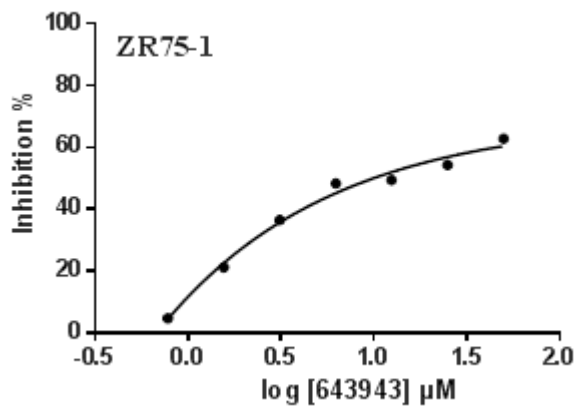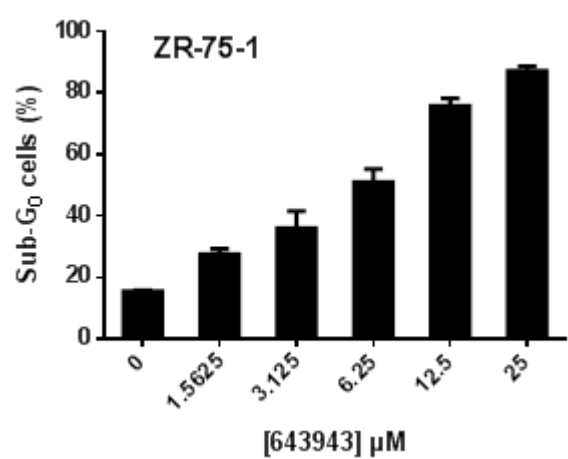

**Supplementary Figure 3.** The MTT assay and flow-cytometric assays for **643943** on the cell growth inhibition of BT-483 (A), MDA-MB-468 (B) and ZR-75-1 (C). Data were obtained from three independent experiments.
